# Supplementary material for: Cotargeting Plk1 and androgen receptor enhances the therapeutic sensitivity of paclitaxel-resistant prostate cancer
Source: PubMed Central journal article supplement — Ther Adv Med Oncol. 2019 May 8;11:1758835919846375. doi: 10.1177/1758835919846375 (PMC6515847; doi:10.1177/1758835919846375), 2019-05-08

# Supplementary Information

## Cotargeting Plk1 and androgen receptor enhances the therapeutic sensitivity of paclitaxel-resistant prostate cancer

Sol-Bi SHIN, Sang-Uk WOO, and Hyungshin YIM\*

Department of Pharmacy, College of Pharmacy, Institute of Pharmaceutical Science and Technology, Hanyang University, Ansan, Gyeonggi-do 15588, Korea

\*Corresponding author

Hyungshin YIM

Address: Department of Pharmacy, College of Pharmacy, Institute of Pharmaceutical Science and Technology, Hanyang University, Ansan, Gyeonggi-do 15588, Korea

Phone: +82-31-400-5810

E-mail: [hsyim@hanyang.ac.kr](mailto:hsyim@hanyang.ac.kr)

### Running Title

Cotargeting Plk1 and AR in taxol-resistant prostate cancer

### Supplementary Figure 1.

Cells were treated with paclitaxel in a concentration-dependent manner in LNCaP, paclitaxel-resistant LNCaP (LNCaP<sup>TXR</sup>), NCI-H460, and paclitaxel-resistant NCI-H460 (H460<sup>TXR</sup>) cells for 48 h. The numbers of viable cells were then measured by a cell viability assay. The bar graph presents the mean values of half maximal growth inhibitory concentration (GI<sub>50</sub>, nM for paclitaxel).

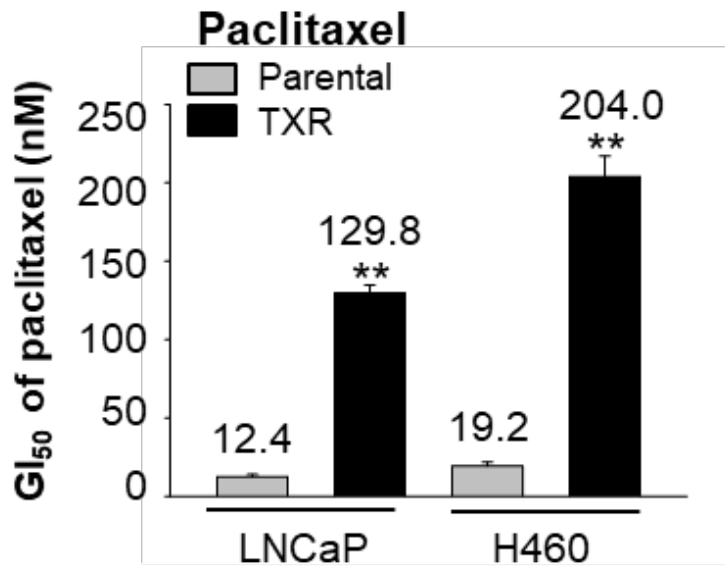

**Supplementary Table 1. A combination of BI 2536 and bicalutamide in paclitaxel-resistant LNCaP<sup>TXR</sup> cells.** LNCaP and LNCaP<sup>TXR</sup> cells were treated with BI 2536 and bicalutamide in a concentration-dependent manner for 48 h. The percentages of viable cells were measured by a cell viability assay.

|                            |     |                      | BI 2536 (nM)    |                |                |                |                |                |
|----------------------------|-----|----------------------|-----------------|----------------|----------------|----------------|----------------|----------------|
|                            |     |                      | 0               | 1              | 5              | 10             | 25             | 50             |
| Bicalutamide<br>( $\mu$ M) | 0   | LNCaP                | 100.0 $\pm$ 0.1 | 89.0 $\pm$ 0.1 | 70.4 $\pm$ 1.3 | 48.9 $\pm$ 0.7 | 37.3 $\pm$ 0.4 | 29.5 $\pm$ 0.1 |
|                            |     | LNCaP <sup>TXR</sup> | 100.0 $\pm$ 1.1 | 96.0 $\pm$ 1.6 | 79.7 $\pm$ 0.5 | 70.6 $\pm$ 1.1 | 48.6 $\pm$ 1.2 | 33.1 $\pm$ 0.8 |
|                            | 2.5 | LNCaP                | 82.3 $\pm$ 0.9  | 67.3 $\pm$ 0.9 | 56.9 $\pm$ 0.8 | 43.7 $\pm$ 0.7 | 34.6 $\pm$ 1.1 | 25.0 $\pm$ 1.3 |
|                            |     | LNCaP <sup>TXR</sup> | 73.2 $\pm$ 1.6  | 67.4 $\pm$ 0.9 | 58.8 $\pm$ 1.6 | 50.0 $\pm$ 1.4 | 38.1 $\pm$ 0.9 | 27.0 $\pm$ 1.1 |
|                            | 5.5 | LNCaP                | 72.3 $\pm$ 1.3  | 54.8 $\pm$ 1.3 | 51.5 $\pm$ 1.3 | 36.9 $\pm$ 1.1 | 22.7 $\pm$ 1.8 | 17.3 $\pm$ 0.8 |
|                            |     | LNCaP <sup>TXR</sup> | 67.6 $\pm$ 1.2  | 60.1 $\pm$ 1.0 | 53.2 $\pm$ 1.4 | 38.7 $\pm$ 1.0 | 28.6 $\pm$ 0.6 | 18.4 $\pm$ 0.4 |

**Supplementary Table 2. A combination of volasertib and bicalutamide in paclitaxel-resistant LNCaP<sup>TXR</sup> cells.** LNCaP and LNCaP<sup>TXR</sup> cells were treated with volasertib and bicalutamide in a concentration-dependent manner for 48 h. The percentages of viable cells were measured by a cell viability assay.

|                                             |            |                      | Volasertib (nM) |                |                |                |                |                |
|---------------------------------------------|------------|----------------------|-----------------|----------------|----------------|----------------|----------------|----------------|
|                                             |            |                      | 0               | 1              | 5              | 10             | 25             | 50             |
| <b>Bicalutamide<br/>(<math>\mu</math>M)</b> | <b>0</b>   | LNCaP                | 100.0 $\pm$ 0.1 | 89.0 $\pm$ 0.1 | 68.3 $\pm$ 1.1 | 50.9 $\pm$ 0.6 | 43.3 $\pm$ 0.3 | 29.5 $\pm$ 0.1 |
|                                             |            | LNCaP <sup>TXR</sup> | 100.0 $\pm$ 1.1 | 92.3 $\pm$ 1.6 | 75.7 $\pm$ 0.5 | 69.8 $\pm$ 0.9 | 60.2 $\pm$ 1.0 | 49.1 $\pm$ 0.5 |
|                                             | <b>2.5</b> | LNCaP                | 81.1 $\pm$ 0.4  | 77.9 $\pm$ 0.7 | 57.1 $\pm$ 0.2 | 46.8 $\pm$ 0.9 | 39.8 $\pm$ 0.4 | 24.4 $\pm$ 0.4 |
|                                             |            | LNCaP <sup>TXR</sup> | 72.1 $\pm$ 0.3  | 66.0 $\pm$ 1.4 | 60.4 $\pm$ 1.7 | 51.7 $\pm$ 1.1 | 44.4 $\pm$ 0.7 | 30.6 $\pm$ 1.1 |
|                                             | <b>5.5</b> | LNCaP                | 71.8 $\pm$ 1.4  | 58.2 $\pm$ 1.6 | 53.4 $\pm$ 0.9 | 39.9 $\pm$ 2.0 | 28.1 $\pm$ 0.4 | 17.5 $\pm$ 0.8 |
|                                             |            | LNCaP <sup>TXR</sup> | 66.5 $\pm$ 1.4  | 63.1 $\pm$ 0.9 | 55.7 $\pm$ 1.5 | 40.4 $\pm$ 1.4 | 33.5 $\pm$ 1.1 | 19.7 $\pm$ 0.8 |

**Supplementary Table 3. A combination of genistein and bicalutamide in paclitaxel-resistant LNCaP<sup>TXR</sup> cells.** LNCaP and LNCaP<sup>TXR</sup> cells were treated with genistein and bicalutamide in a concentration-dependent manner for 48 h. The percentages of viable cells were measured by a cell viability assay.

|                                                          |            |                      | Genistein ( $\mu\text{M}$ ) |                |                |                |                |                |
|----------------------------------------------------------|------------|----------------------|-----------------------------|----------------|----------------|----------------|----------------|----------------|
|                                                          |            |                      | 0                           | 1              | 5              | 10             | 25             | 50             |
| <b>Bicalutamide</b><br><b>(<math>\mu\text{M}</math>)</b> | <b>0</b>   | LNCaP                | 100.0 $\pm$ 1.4             | 87.9 $\pm$ 1.3 | 79.9 $\pm$ 1.2 | 70.4 $\pm$ 1.1 | 60.8 $\pm$ 1.0 | 38.4 $\pm$ 1.4 |
|                                                          |            | LNCaP <sup>TXR</sup> | 100.0 $\pm$ 0.8             | 77.7 $\pm$ 2.3 | 64.0 $\pm$ 1.3 | 50.5 $\pm$ 0.5 | 46.1 $\pm$ 1.8 | 37.3 $\pm$ 1.1 |
|                                                          | <b>2.5</b> | LNCaP                | 82.0 $\pm$ 1.1              | 66.2 $\pm$ 1.2 | 61.0 $\pm$ 1.5 | 54.2 $\pm$ 1.3 | 47.8 $\pm$ 1.3 | 37.3 $\pm$ 2.2 |
|                                                          |            | LNCaP <sup>TXR</sup> | 74.0 $\pm$ 1.2              | 69.8 $\pm$ 1.6 | 59.3 $\pm$ 1.6 | 48.2 $\pm$ 0.9 | 35.3 $\pm$ 1.5 | 25.7 $\pm$ 0.6 |
|                                                          | <b>5.5</b> | LNCaP                | 71.0 $\pm$ 1.6              | 65.4 $\pm$ 1.5 | 55.6 $\pm$ 1.2 | 48.4 $\pm$ 1.2 | 40.5 $\pm$ 0.8 | 36.1 $\pm$ 0.6 |
|                                                          |            | LNCaP <sup>TXR</sup> | 68.5 $\pm$ 1.2              | 55.2 $\pm$ 2.3 | 48.6 $\pm$ 0.9 | 37.9 $\pm$ 0.6 | 30.3 $\pm$ 1.2 | 19.8 $\pm$ 0.3 |

**Supplementary Table 4. Oligonucleotide sequence of PCR primers used in this study**

| <b>Gene</b> | <b>Forward primer (5'-3')</b> | <b>Reverse primer (5'-3')</b> |
|-------------|-------------------------------|-------------------------------|
| MDR1        | 5'-ATATCAGCAGCCCACATCAT -3'   | 5'- GAAGCACTGGGATGTCCGGT -3'  |
| MRP1        | 5'-CAGTGACCTCTGGTCCTTAAAC-3'  | 5'-ATCCACCTTGGA ACTCTCTTTC-3' |
| PLK1        | 5'- AAGAGATCCCGGAGGTCCTA -3'  | 5'- TCATTCAGGAAAAGGTTGCC -3'  |
| AR          | 5'-CGCTGAAGGGAAACAGAAGTA-3'   | 5'-CCTCTCCTTCCTCCTGTAGTT-3'   |
| PSA         | 5'-CTTGTAGCCTCTCGTGGCAG-3'    | 5'-GACCTTCATAGCATCCGTGAG-3'   |

## Supplementary Figure 2

### Figure 1D

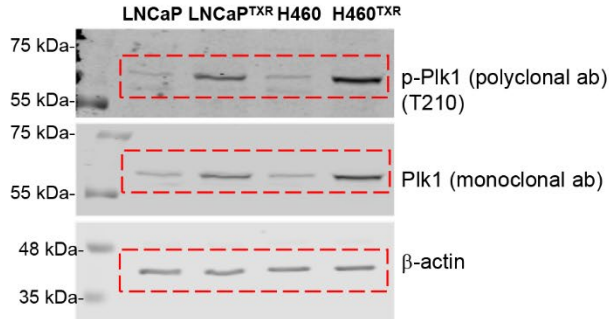

### Figure 4F

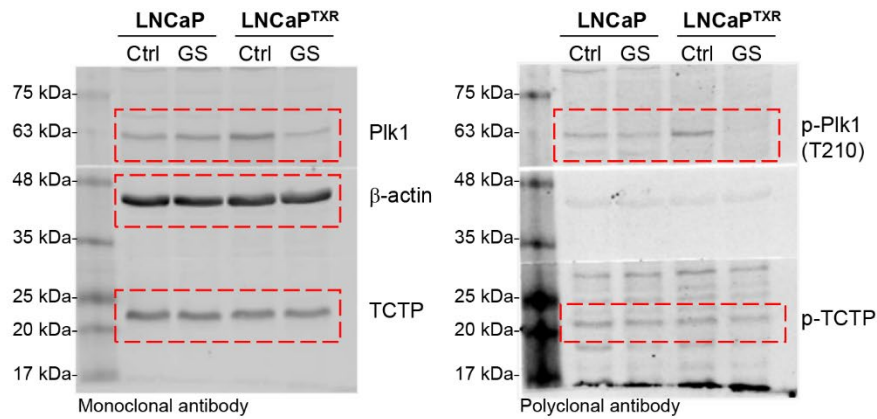

### Figure 5D

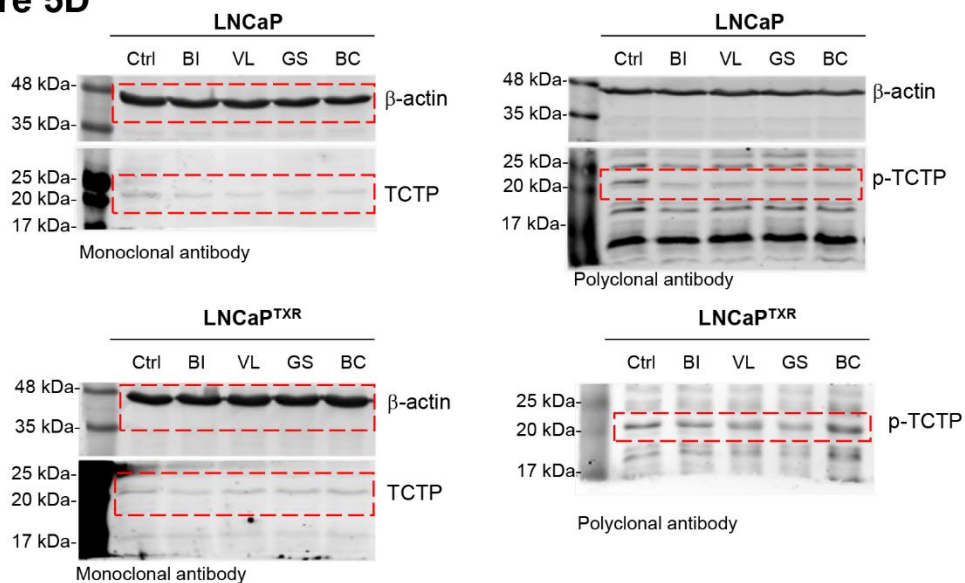

Supplement: Supplementary_Information-TAMO.pdf [file Supplementary_Information-TAMO.pdf]
